# Supplementary material
Source: Springer Nature journal article supplement (https://www.springermedizin.de/resource/supplementary/12891_2008_659_MOESM5_ESM.pdf/9506494)
Supplement: MOESM5 [file 9506494]

**A**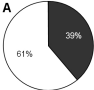

□ No VESC at age 40

■ VESC at age 40

**B**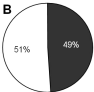

□ No VESC at age 44

■ VESC at age 44

**C**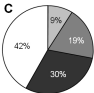

□ No VESC at both ages

■ VESC at both ages

■ New VESC at age 44

■ VESC disappeared at age 44
